# Supplementary material
Source: PubMed Central journal article supplement (PMC9764083)
Supplement: NIHMS1854771-supplement-supporting_information.pdf [file NIHMS1854771-supplement-supporting_information.pdf]

## Supplemental Information

### **Inhibition of NADPH Oxidase-ROS Signal using Hyaluronic Acid Nanoparticles for Overcoming Radioresistance in Cancer Therapy**

Lei Zhu<sup>1</sup>, Yi Zhao<sup>1,2</sup>, Tongrui Liu<sup>1</sup>, Minglong Chen<sup>1,4</sup>, Wei Ping Qian<sup>1</sup>, Binghua Jiang<sup>5</sup>,  
Benjamin G. Barwick<sup>6</sup>, Lumeng Zhang<sup>1,3</sup>, Toncred M Styblo<sup>1</sup>, Xiaoxian Li<sup>7</sup>, and Lily Yang<sup>1,\*</sup>

1. Winship Cancer Institute, Department of Surgery, Emory University School of Medicine, Atlanta, GA 30322, United States;
2. Jiangxi University of Traditional Chinese Medicine, Nanchang 330004, China;
3. Department of Nuclear Medicine, China-Japan Union Hospital, Jilin University, Changchun, 130033, China;
4. Department of Pathology, Anatomy and Cell Biology, Thomas Jefferson University, Philadelphia, PA 19107, United States;
5. Department of Hematology and Medical Oncology, Emory University School of Medicine, Atlanta, GA 30322, United States;
6. Department of Pathology and Laboratory Medicine, Emory University School of Medicine, Atlanta, GA 30322, United States;

\* To whom correspondence should be addressed. E-mail: [lyang02@emory.edu](mailto:lyang02@emory.edu).

## **Materials and methods**

### **Internalization of HANP/GKT831 in tumor cells**

The MCF7 and Breast VII PDX derived tumor cells were cultured in Dulbecco's modified Eagle's medium containing 10% fetal bovine serum and 1% penicillin–streptomycin at 37°C in a CO<sub>2</sub> incubator. Cells were seeded onto an eight-well chamber slide ( $1 \times 10^5$  cells/well) and cultured for 24 h at 37°C. The culture medium was then replaced with the medium containing NIR 830 dye labeled HANP/GKT831 and incubated for 4 h at 37 °C. After washing with phosphate-buffered saline (PBS) (pH 7.4), cells were fixed in cold ethanol for 15 min. Following nuclear staining with 4',6-diamidino-2-phenylindole (DAPI) for 10 min, the slide was examined and imaged under an inverted fluorescence microscope with a NIR filter set (Ex/Em: 780/800 nm).

### **Drug delivery in tumor cells**

MCF7 cells were incubated with 6 mL of culture medium containing 1 mg of GKT831 equivalent concentration of HANP/GKT831 or free GKT831 overnight at 37 °C. Cells were then washed with PBS and collected by trypsinization. Harvested cell pellets ( $1 \times 10^6$  cells for each group) were mixed with acetonitrile containing 0.01% trifluoroacetic acid (v/v) to precipitate cellular proteins and extract the intracellular GKT831. The mixtures were then centrifuged at 3,000 rpm for 3 min and the supernatant (20  $\mu$ L) was injected into HPLC with a reverse-phase C18 column. The amount of GKT831 released from HANP/GKT831 in cells was analyzed and calculated using a standard GKT831 curve ( $y = 2156.65x - 1.05$ ,  $R^2 = 0.9999$ ).

### **Detection of apoptotic cell death using flow cytometry analysis**

The Breast VII PDX tumor cells were seeded onto six-well plates and cultured overnight at 37 °C. The culture medium was then replaced with fresh medium containing free GKT831 (5  $\mu$ M), HANP (0.1  $\mu$ M), and HANP/GKT831 (containing 5  $\mu$ M of GKT831 and 0.1  $\mu$ M of HANP) and incubated

at 37°C for 48 h. After washing the harvested cells in 1× Binding Buffer, cells were labeled with 5 μL of Annexin V/7-AAD apoptosis detection agents (BD Bioscience Catalog Number 556454 and 559925) for 15 min at room temperature. Cells were examined using a BD FACS A3 Cell Analyzer (BD Biosciences, Franklin Lakes, NJ).

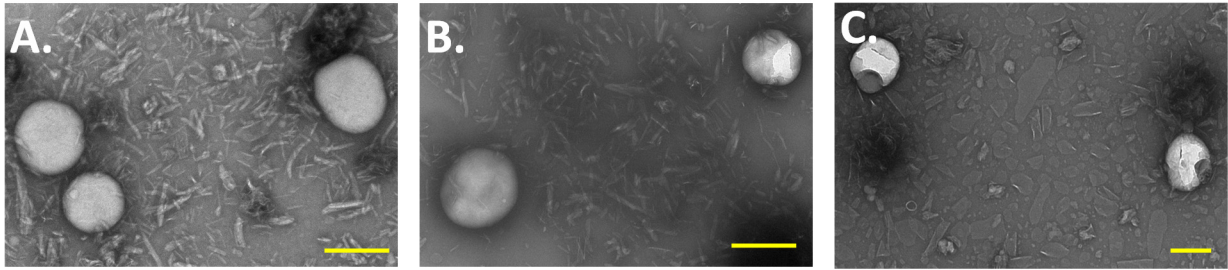

**Figure S1.** TEM images of HANP and HANP/GKT831. **A.** A TEM image of freshly made HANPs. **B.** A TEM image of HANPs after one-month storage at 4°C. **C.** A TEM image of HANP/GKT831 after one month storage at 4°C. Scale bars equal 200 nm.

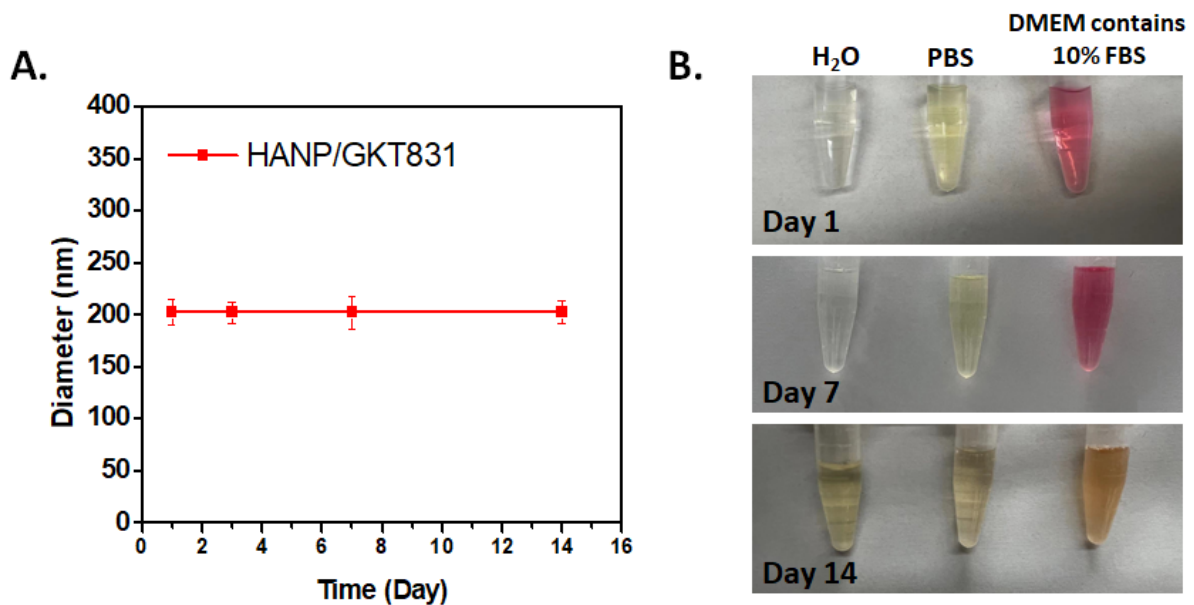

**Figure S2.** Stability of HANP/GKT831. **A.** hydrodynamic sizes of HANP/GKT831 after storing in H<sub>2</sub>O for 14 days. No significant changes in the nanoparticle size were noticed. **B.** Stability of HANP/GKT831 in solutions, including H<sub>2</sub>O, PBS, and cell cultural DMEM medium containing 10% FBS. No precipitant was observed.

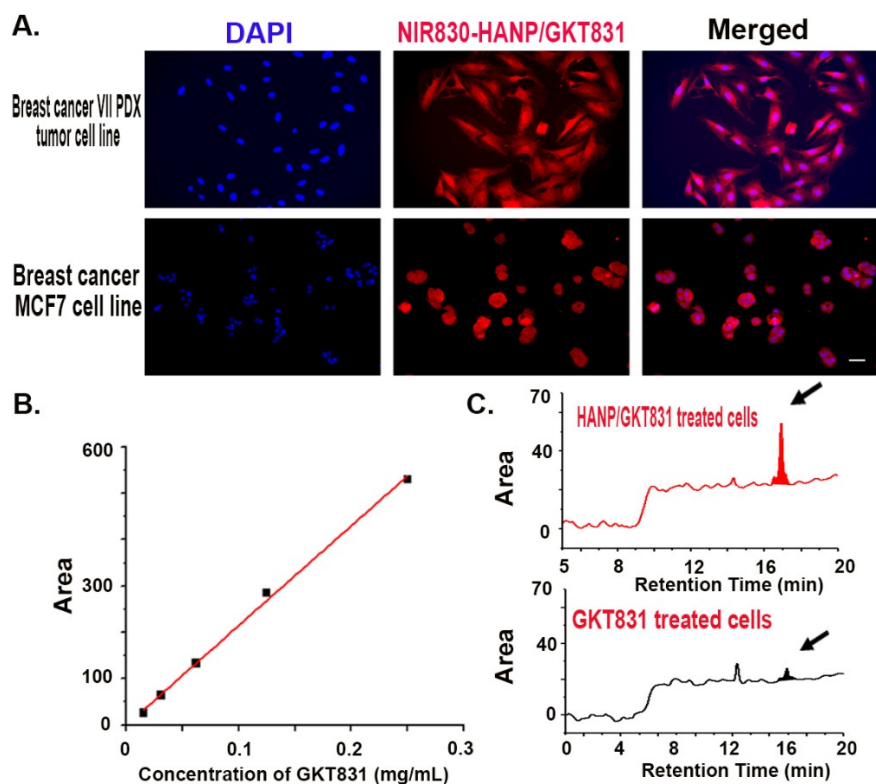

**Figure S3. Internalization of HANP/GKT831 in breast cancer cells.** A. Following 4 hr incubation, NIR830 dye labeled HANPs/GKT831 were detected in breast cancer cells. NIR 830 signal: red. Scale bar: 50  $\mu\text{m}$ . B. A standard curve of GKT831 determined by HPLC. C. Quantification of GKT831 in breast cancer cells using HPLC. *Upper*: 18  $\mu\text{g}$  of GKT831 was detected and calculated in HANP/GKT831 incubated MCF7 cells ( $1 \times 10^6$  cells). *Lower*: 5  $\mu\text{g}$  of GKT831 was detected and calculated in free GKT831 incubated MCF7 cells ( $1 \times 10^6$  cells). Retention time of GKT831 is 16.93 min.

### PANC II PDX tumor cell line

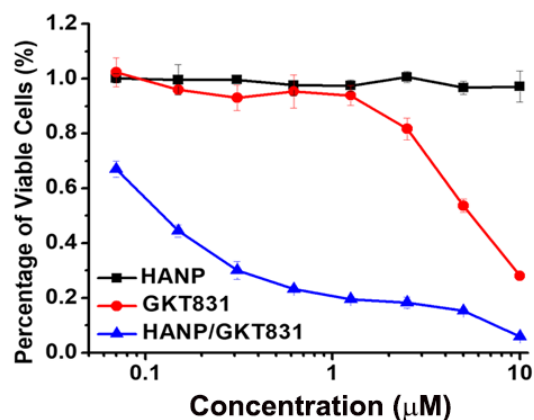

**Figure S4.** Cell proliferation assay determined using SRB assay.  $\text{IC}_{50}$  of HANP/GKT831 on the pancreatic II PDX tumor derived cell line is 0.38  $\mu\text{M}$ , and  $\text{IC}_{50}$  of free GKT831 is 3.5  $\mu\text{M}$ .

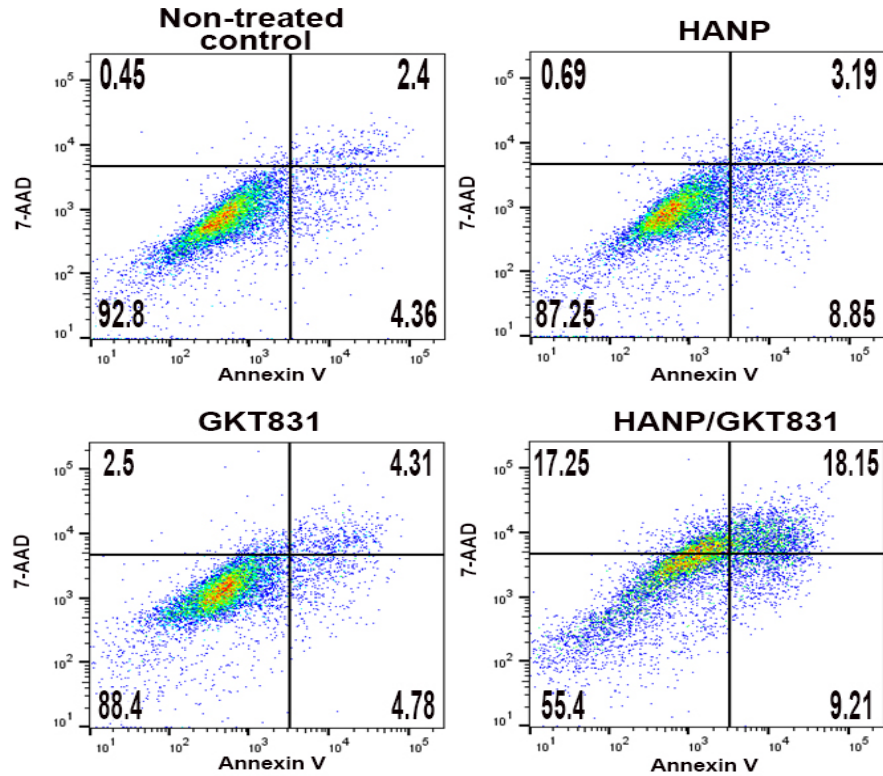

**Figure S5.** HANP/GKT831 induced apoptosis in the Breast VII PDX tumor derived cell line determined by Annexin V/7AAD assay. Representative results of flow cytometry analysis of treated tumor cells. The percentages of the apoptotic cells are shown in the lower right (early apoptotic cells: Annexin-V+) and upper right (late apoptotic cells: Annexin-V+/7-AAD+) of the quadrant. The percentages of the total apoptotic cells from the mean of two independent experiments are the following: HANP/GKT831 treated cells: 27.4%, HANP treated cells: 12.0%, GKT831-treated cells: 9.1%, and No-treatment control: 6.8%.

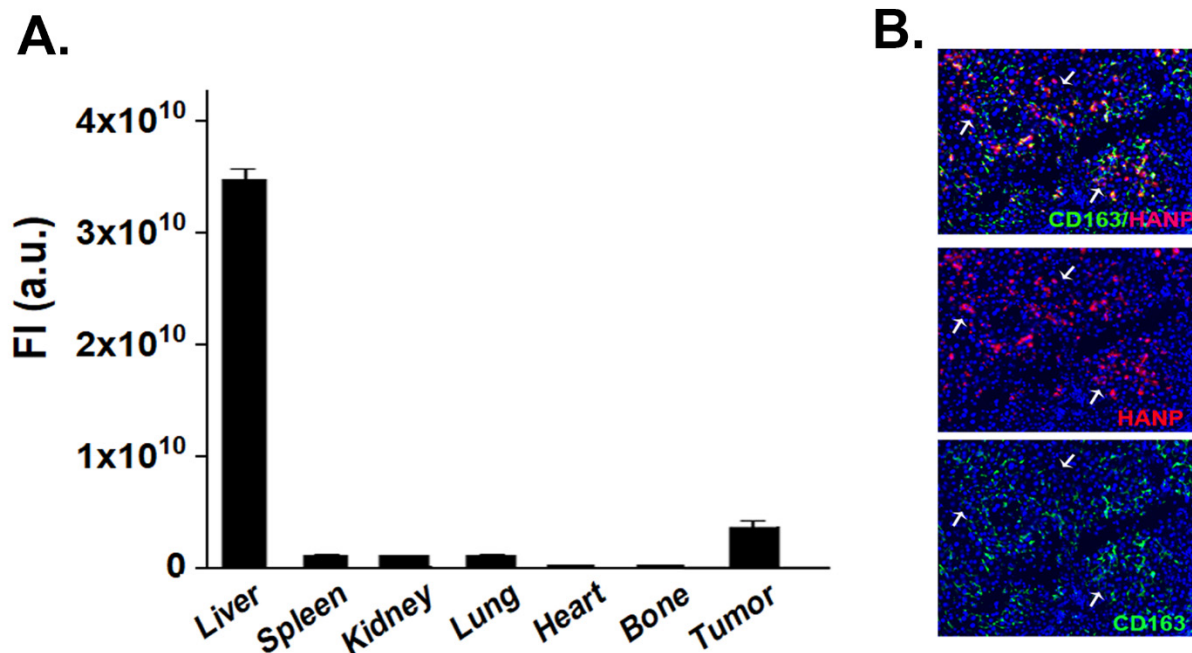

**Figure S6. Evaluation of biodistribution of HANP/GKT831 following i.v. delivery.** Nude mice bearing the orthotopic Breast VII PDX tumor received i.v. delivery of NIR830 dye labeled HANP for 24 hrs. Biodistribution of NIR 830-HANP in the tumor bearing mice was determined by *ex vivo* optical imaging of the tumor and normal organs after sacrificing mice. **A.** Quantification of NIR fluorescence signal in tumor and normal organs. **B.** Detection of localization of NIR830-HANP in the liver. A high level of NIR signal (red, NIR 830-HANP) positive cells are not co-localized with CD163+ macrophages in liver.
